# Supplementary material
Source: PubMed Central journal article supplement (PMC1964797)

**A**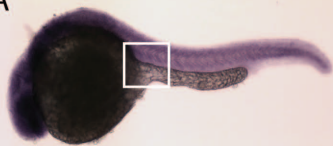**B**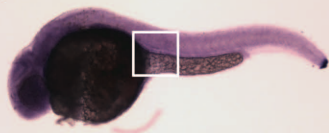**C**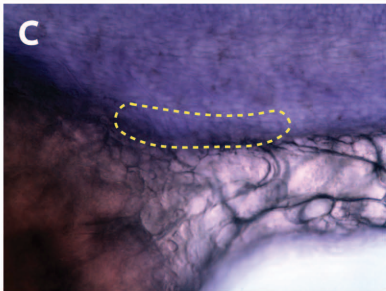**D**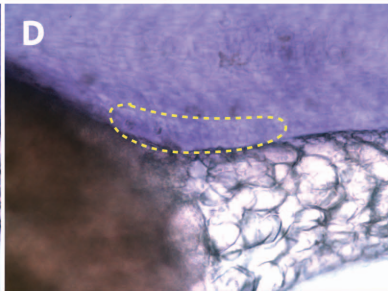**E**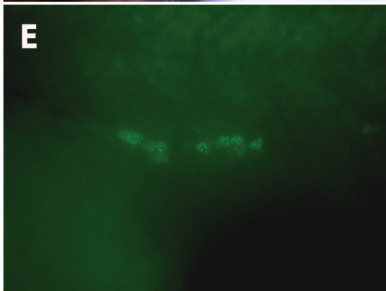**F**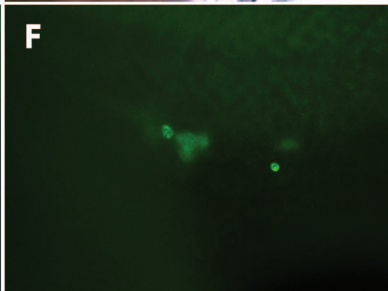**G**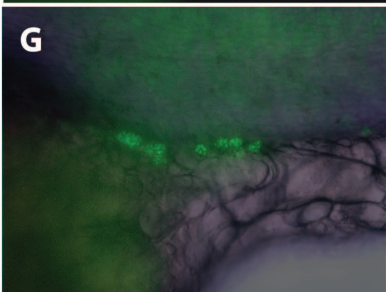**H**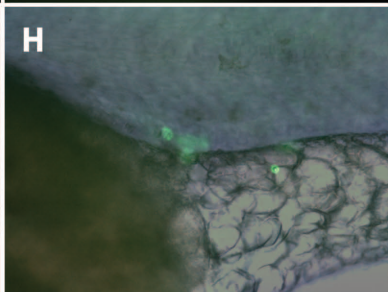

Supplement: NIHMS22456-supplement-02.pdf [file NIHMS22456-supplement-02.pdf]
